# Supplementary material for: Characterization of Bacillus Strains from Natural Honeybee Products with High Keratinolytic Activity and Antimicrobial Potential
Source: MDPI journal article supplement (doi:10.3390/microorganisms11020456), 2023-02-11
Supplement: s1 [file s1]

**Table S1. Antimicrobial Potential.** Gene clusters associated with the synthesis of nonribosomal peptide-synthetases (NRPS), polyketide synthases (PKSs) and ribosomally synthesized and post-translationally modified peptides (RiPPs) identified in the genomes of the *Bacillus* isolates AB6, CG1, X1 and Z1.

| Strain                         | Source      | Gene Cluster        | Antibiotic <sup>#</sup>                  | Similarity (%) <sup>*</sup> | Reference |
|--------------------------------|-------------|---------------------|------------------------------------------|-----------------------------|-----------|
| <i>B. sonorensis</i><br>AB6    | Honey       | NRPS                | Lichenysin                               | 100                         | (61)      |
|                                |             | NRPS                | Bacitracin                               | 88                          | (62)      |
|                                |             | NRPS                | Bacillibactin, paenibactin, griseobactin | 46                          | (63)      |
|                                |             | RiPP, Lantipeptide  | Cytolysin                                | 40                          | (64)      |
|                                |             | NRPS                | Fengycin                                 | 30                          | (65)      |
|                                |             | RiPP, Lantipeptide  | Streptin                                 | 20                          | (66)      |
|                                |             | NRPS-PKS            | Plipastatin                              | 23                          | (67)      |
|                                |             | NRPS                | Plipastatin- Fengycin                    | 15                          | (65, 67)  |
|                                |             | RiPP, Lasso peptide | ND                                       | -                           | (68)      |
| <i>B. licheniformis</i><br>CG1 | Honey       | NRPS                | Lichenysin                               | 100                         | (61)      |
|                                |             | RiPP, Lantipeptide  | Lichenicidin                             | 100                         | (57)      |
|                                |             | NRPS                | Bacillibactin, griseobactin              | 46                          | (63)      |
| <i>B. sonorensis</i><br>X1     | Royal Jelly | NRPS                | Lichenysin                               | 100                         | (61)      |
|                                |             | NRPS                | Bacitracin                               | 88                          | (62)      |
|                                |             | NRPS                | Bacillibactin, paenibactin, griseobactin | 46                          | (63)      |
|                                |             | NRPS                | Fengycin                                 | 30                          | (65)      |
|                                |             | NRPS-PKS            | Plipastatin                              | 23                          | (67)      |
|                                |             | NRPS                | Plipastatin- Fengycin                    | 23                          | (65, 67)  |
|                                |             | RiPP, Lantipeptide  | Streptin                                 | 20                          | (66)      |
|                                |             | RiPP, Lasso peptide | ND                                       | -                           | (68)      |
| <i>B. subtilis</i><br>Z1       | Honey       | NRPS                | Fengycin                                 | 100                         | (65)      |
|                                |             | RiPP, sactipeptide  | Sporulation killing factor, skfA         | 100                         | (69)      |
|                                |             | RiPP, sactipeptide  | Subtilosin A                             | 100                         | (70)      |
|                                |             | NRPS-PKS            | Bacillaene                               | 92                          | (71)      |
|                                |             | NRPS                | Bacillibactin                            | 92                          | (63)      |
|                                |             | NRPS                | Bacilysin                                | 85                          | (72)      |
|                                |             | NRPS                | Surfactin                                | 78                          | (73)      |
|                                |             | RiPP, glyocin       | Sublancin                                | 66                          | (74)      |

#ND, not described; \*Percentage of similar genes found in other clusters

57. Begley, M.; Cotter, P.D.; Hill, C.; Ross, R.P. Identification of a novel two-peptide lantibiotic, lichenicidin, following rational genome mining for LanM proteins. *Appl. Environ. Microbiol.* **2009**, *75*, 5451–5460.
61. Yakimov, M.M.; Timmis, K.N.; Wray, V.; Fredrickson, H.L. Characterization of a new lipopeptide surfactant produced by thermotolerant and halotolerant subsurface *Bacillus licheniformis* BAS50. *Appl. Environ. Microbiol.* **1995**, *61*, 1706–1713.
62. Eppelmann, K.; Doekel, S.; Marahiel, M.A. Engineered biosynthesis of the peptide antibiotic bacitracin in the surrogate host *Bacillus subtilis*. *J. Biol. Chem.* **2001**, *276*, 34824–34831.
63. May, J.J.; Wendrich, T.M.; Marahiel, M.A. The *dhb* operon of *Bacillus subtilis* encodes the biosynthetic template for the catecholic siderophore 2,3-dihydroxybenzoate-glycine-threonine trimeric ester bacillibactin. *J. Biol. Chem.* **2001**, *276*, 7209–7217.
64. Coburn, P.S.; Gilmore, M.S. The *Enterococcus faecalis* cytolyisin: a novel toxin active against eukaryotic and prokaryotic cells. *Cell Microbiol.* **2003**, *5*, 661–669.
65. Koumoutsis, A.; Chen, X.H.; Henne, A.; Liesegang, H.; Hitzeroth, G.; Franke, P.; Vater, J.; Borriss, R. Structural and functional characterization of gene clusters directing nonribosomal synthesis of bioactive cyclic lipopeptides in *Bacillus amyloliquefaciens* strain FZB42. *J. Bacteriol.* **2004**, *186*, 1084–1096.
66. Wescombe, P.A.; Tagg, J.R. Purification and characterization of streptin, a type A1 lantibiotic produced by *Streptococcus pyogenes*. *Appl. Environ. Microbiol.* **2003**, *69*, 2737–2747.
67. Umezawa, H.; Aoyagi, T.; Nishikiori, T.; Okuyama, A.; Yamagishi, Y.; Hamada, M.; Takeuchi, T. Plipastatins: new inhibitors of phospholipase A2, produced by *Bacillus cereus* BMG302-ff67. I. Taxonomy, production, isolation and preliminary characterization. *J. Antibiot. (Tokyo)* **1986**, *39*, 737–744.
68. Hegemann, J.D.; Zimmermann, M.; Xie, X.; Marahiel, M.A. Lasso peptides: an intriguing class of bacterial natural products. *Acc. Chem. Res.* **2015**, *48*, 1909–1919.
69. Allenby, N.E.; Watts, C.A.; Homuth, G.; Pragai, Z.; Wipat, A.; Ward, A.C.; Harwood, C.R. Phosphate starvation induces the sporulation killing factor of *Bacillus subtilis*. *J. Bacteriol.* **2006**, *188*, 5299–5303.
70. Babasaki, K.; Takao, T.; Shimonishi, Y.; Kurahashi, K. 1985. Subtilosin A, a new antibiotic peptide produced by *Bacillus subtilis* 168: isolation, structural analysis, and biogenesis. *J. Biochem.* **1985**, *98*, 585–603.
71. Patel, P.S.; Huang, S.; Fisher, S.; Pirnik, D.; Aklonis, C.; Dean, L.; Meyers, E.; Fernandes, P.; Mayerl, F. Bacillaene, a novel inhibitor of prokaryotic protein synthesis produced by *Bacillus subtilis*: production, taxonomy, isolation, physico-chemical characterization and biological activity. *J. Antibiot. (Tokyo)* **1995**, *48*, 997–1003.
72. Rogers, H.J.; Newton, G.G.; Abraham, E.P. Production and purification of bacilysin. *Biochem. J.* **1965**, *97*, 573–578.
73. Arima, K.; Kakinuma, A.; Tamura, G. Surfactin, a crystalline peptidelipid surfactant produced by *Bacillus subtilis*: isolation, characterization and its inhibition of fibrin clot formation. *Biochem. Biophys. Res. Commun.* **1968**, *31*, 488–494.
74. Paik, S.H.; Chakicherla, A.; Hansen, J.N. Identification and characterization of the structural and transporter genes for, and the chemical and biological properties of, sublaicin 168, a novel lantibiotic produced by *Bacillus subtilis* 168. *J. Biol. Chem.* **1998**, *273*, 23134–23142.
